# Supplementary material for: Exercise for patients with major depression: a systematic review with meta-analysis and trial sequential analysis
Source: PubMed Central journal article supplement — BMJ Open. 2017 Sep 18;7(9):e014820. doi: 10.1136/bmjopen-2016-014820 (PMC5623558; doi:10.1136/bmjopen-2016-014820), 2017-09-18

Article:

Exercise for patients with major depression: A systematic review with meta-analysis and trial sequential-analysis

**Supplementary Figure**

**Figure S2.** Trial Sequential Analysis and required information size for the effect of exercise for depressive symptoms including four-teen trials reporting on HAM-D<sub>17</sub>.

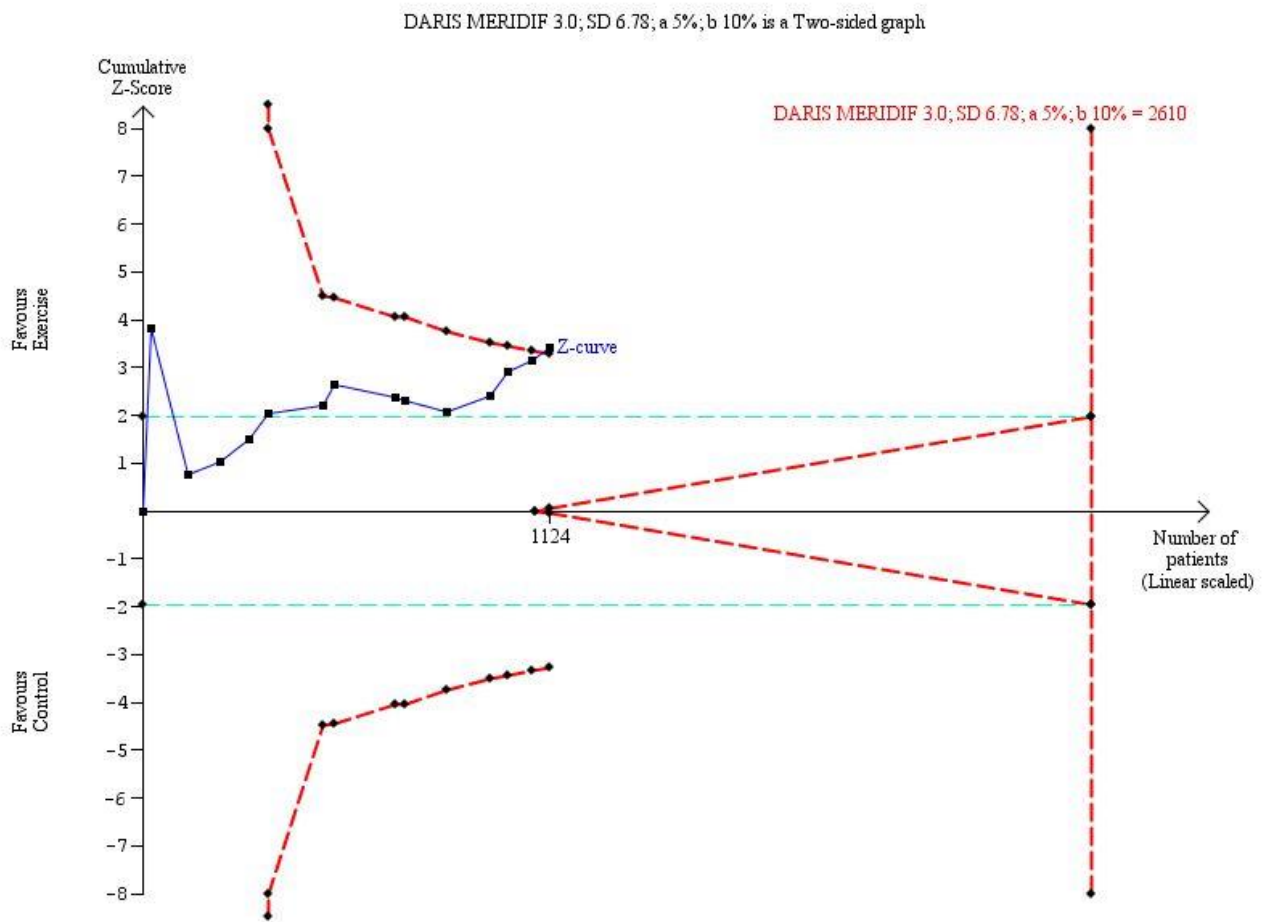

Supplement: bmjopen-2016-014820supp002.pdf [file bmjopen-2016-014820supp002.pdf]
