# Supplementary material for: Exercise for patients with major depression: a systematic review with meta-analysis and trial sequential analysis
Source: PubMed Central journal article supplement — BMJ Open. 2017 Sep 18;7(9):e014820. doi: 10.1136/bmjopen-2016-014820 (PMC5623558; doi:10.1136/bmjopen-2016-014820), 2017-09-18
Supplement: bmjopen-2016-014820supp012.pdf [file bmjopen-2016-014820supp012.pdf]

Article:

Exercise for patients with major depression: A systematic review with meta-analysis and trial sequential-analysis

**Supplementary Table S2**

**Table S2.** Trials characteristics for exploration of heterogeneity in trials assessing the effect of exercise in patients diagnosed with depression

| Trial             | Lower risk of bias | Age > 60 | Group vs. individual | Duration | Attention control waitlist | Exercise as add on to drugs vs. exercise alone | Within-study dose exercise | Increase in VO2max <sup>1</sup> | Somatic disease vs. only MD | Trial Includes minor depression |
|-------------------|--------------------|----------|----------------------|----------|----------------------------|------------------------------------------------|----------------------------|---------------------------------|-----------------------------|---------------------------------|
| Klein 1985        | No                 | Young    | Individual           | 12 weeks | Other                      | Exercise alone                                 | No                         | No                              | No                          | Yes                             |
| Martinsen 1985    | No                 | Young    | Group                | 9 weeks  | Attention control          | Unclear                                        | No                         | 11 <sup>a</sup>                 | No                          | No                              |
| Epstein 1986      | No                 | Young    | Group                | 8 weeks  | Waitlist                   | Unclear                                        | No                         | No                              | No                          | Yes                             |
| Doyne 1987        | No                 | Young    | Individual           | 8 weeks  | Waitlist                   | Exercise alone                                 | No                         | No                              | No                          | Yes                             |
| Veale 1992        | No                 | Young    | Group                | 12 weeks | Other                      | Unclear                                        | No                         | No                              | No                          | No                              |
| Singh 1997        | No                 | Old      | Group                | 10 weeks | Attention control          | Exercise alone                                 | No                         | N/A                             | No                          | Yes                             |
| Blumenthal 1999   | No                 | Young    | Group                | 16 weeks | Other                      | Add on                                         | No                         | 2.3                             | No                          | No                              |
| Mather 2002       | No                 | Old      | Group                | 10 weeks | Attention control          | Add on                                         | No                         | No                              | No                          | No                              |
| Dunn 2005         | No                 | Young    | Individual           | 12 weeks | Attention control          | Exercise alone                                 | Yes                        | No                              | No                          | No                              |
| Singh 2005        | No                 | Old      | Group                | 8 weeks  | Other                      | Exercise alone                                 | Yes                        | N/A                             | No                          | Yes                             |
| Pilu 2007         | No                 | Young    | Group                | 24 weeks | Other                      | Add on                                         | No                         | No                              | No                          | No                              |
| Viera 2007        | No                 | Young    | Group                | 12 weeks | Other                      | Add on                                         | No                         | No                              | No                          | No                              |
| Blumenthal 2007   | No                 | Young    | Group                | 16 weeks | Other                      | Add on                                         | No                         | 2.0 <sup>a</sup>                | No                          | No                              |
| Krogh 2009        | Yes                | Young    | Group                | 16 weeks | Attention control          | No                                             | No                         | 2.9                             | No                          | No                              |
| Mota-Pereira 2011 | No                 | Young    | Group                | 12 weeks | Other                      | Add on                                         | No                         | No                              | No                          | No                              |
| Krogh 2012        | Yes                | Young    | Group                | 12 weeks | Attention control          | Exercise alone                                 | No                         | 3.4                             | No                          | No                              |
| Chalder 2012      | No                 | Young    | Individual           | 32 weeks | Other                      | No                                             | No                         | No                              | No                          | No                              |
| Fang 2013         | No                 | Young    | Group                | 6 weeks  | Attention control          | No                                             | Yes                        | No                              | No                          | No                              |
| Huipeng 2013      | No                 | Young    | Group                | 6 weeks  | Other                      | No                                             | No                         | No                              | No                          | No                              |
| Cassandra 2014    | No                 | Young    | Group                | 3 weeks  | Other                      | Add on                                         | No                         | No                              | No                          | No                              |
| Danielsson 2014   | No                 | Young    | Group                | 10 weeks | Other                      | Add on                                         | No                         | 2.4                             | No                          | No                              |
| Pfaff 2014        | Yes                | Old      | Group                | 12 weeks | Other                      | No                                             | No                         | 1.5                             | No                          | Yes                             |
| Guifeng 2015      | No                 | Young    | Group                | 8 weeks  | Other                      | No                                             | No                         | No                              | No                          | No                              |
| Jinchun 2015      | No                 | Young    | Group                | 8 weeks  | Other                      | No                                             | No                         | No                              | No                          | No                              |
| Schuch 2015       | Yes                | Young    | Individual           | 2 weeks  | Other                      | No                                             | No                         | No                              | No                          | No                              |
| Kerling 2015      | No                 | Young    | Group                | 6 weeks  | Other                      | No                                             | No                         | 2.8                             | No                          | No                              |

|                   |    |       |            |          |                      |        |     |                  |    |    |
|-------------------|----|-------|------------|----------|----------------------|--------|-----|------------------|----|----|
| Belvederi<br>2015 | No | Old   | Group      | 24 weeks | Other                | Add on | Yes | 0.3 <sup>a</sup> | No | No |
| Carneiro<br>2015  | No | Young | Group      | 16 weeks | Other                | Add on | No  | No               | No | No |
| Doose<br>2015     | No | Young | Group      | 8 weeks  | Other                | No     | No  | 3.2              | No | No |
| Pentecost<br>2015 | No | Young | Individual | 12 weeks | Other                | No     | No  | No               | No | No |
| Legrand<br>2016   | No | Young | Individual | 10 days  | Other                | No     | No  | No               | No | No |
| Salehi<br>2016    | No | Young | Individual | 4 weeks  | Other                | Add on | No  | No               | No | No |
| Euteneuer<br>2017 | No | Young | Individual | 16 weeks | Attention<br>control | No     | No  | No               | No | No |
| Olsen<br>2017     | No | Young | Group      | 8 weeks  | Attention<br>control | No     | No  | No               | No | No |
| Patten<br>2017    | No | Young | Group      | 12 weeks | Other                | No     | No  | 5.0              | No | No |

<sup>1</sup>Increase in VO2max is based on increase in intervention group, if <sup>a</sup> then value is based on an estimate from text or figures.
